# Supplementary material
Source: MDPI journal article supplement (https://www.mdpi.com/2312-7481/10/4/21)
Supplement: s1 [file s1 › magnetochemistry-2877081-supplementary.pdf]

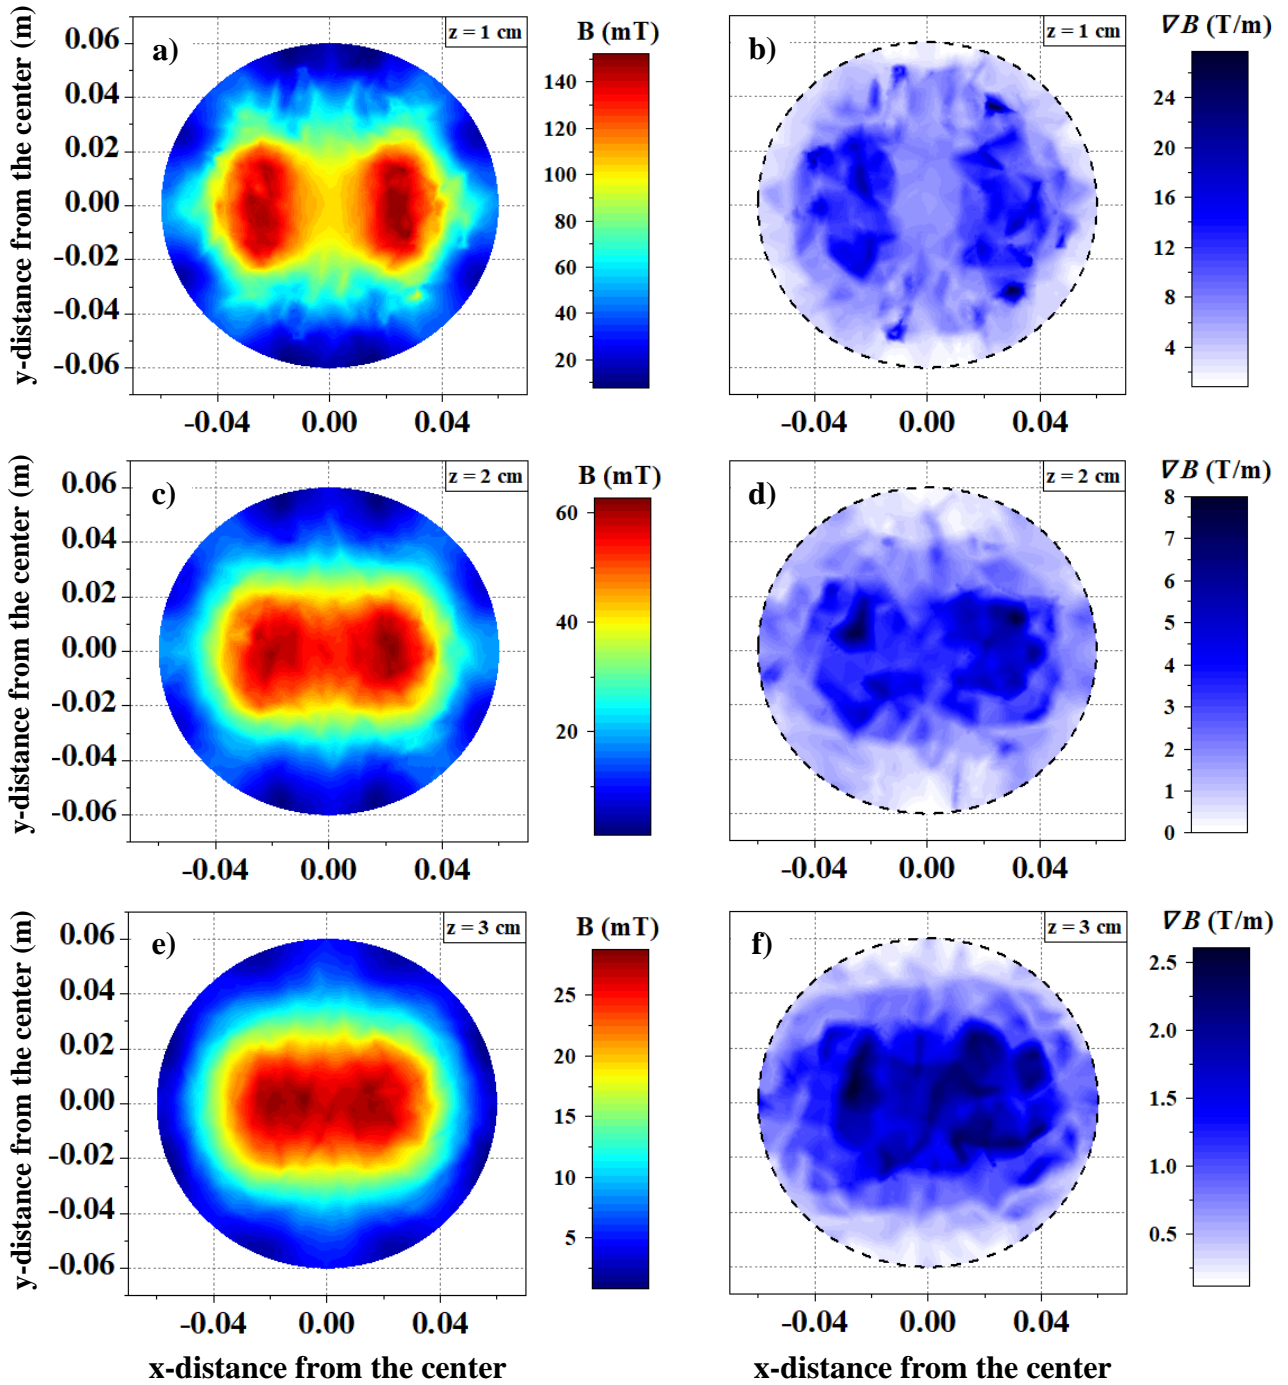

**Figure S1:** Examples of the computationally derived  $B$  and  $\nabla B$  contour plots from the single disk setup. The vertical axes express the vertical distance from the center of the colored circle, while the horizontal axes the horizontal distance. With a rainbow palette, the magnetic flux density results are visualized and with the blue palette the magnetic field gradient calculations. a-b) 1 cm distance from the top surface of the magnets, c-d) 2 cm distance and e-f) 3 cm distance.

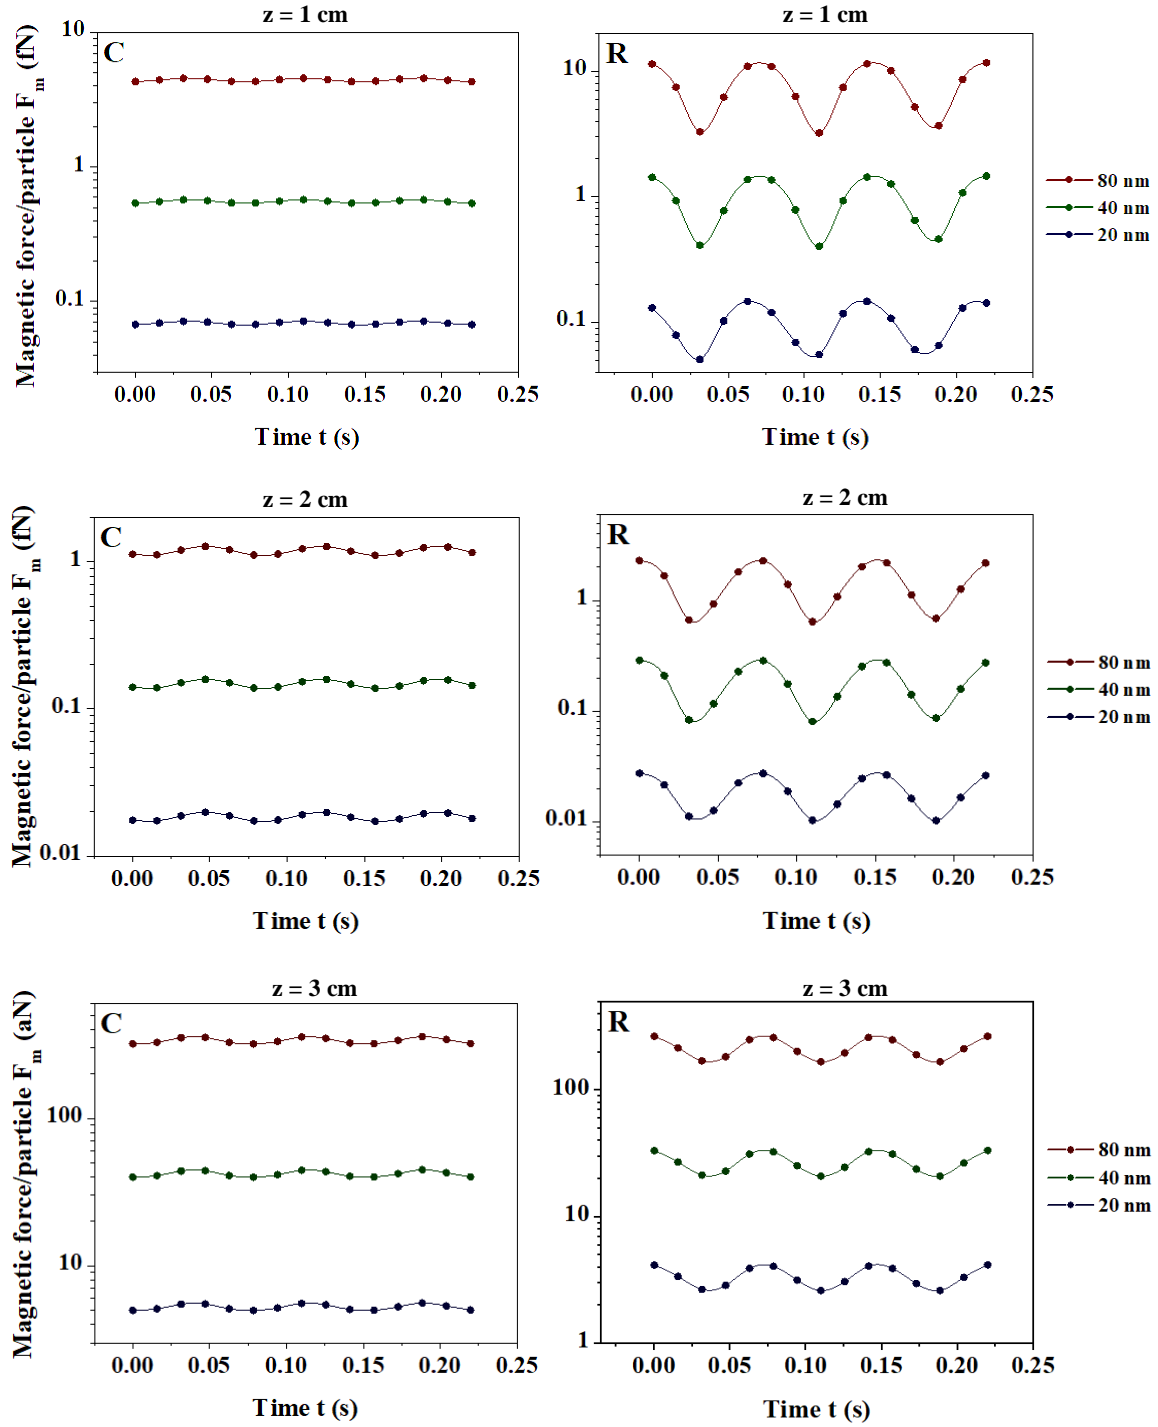

**Figure S2:** Time evolution of the exerted magnetic forces per ferromagnetic particle of varying size. The curves are at the planes with  $z = 1, 2$  and  $3$  cm. C and R denote the characteristic points in those planes, the coordinates of whom were given in the previous section.
